# Supplementary figures and images for: Effects of Religious Practice and Teachings about Sexual Behavior on Intent to Vaccinate against Human Papillomavirus
Source: MDPI journal article supplement (doi:10.3390/vaccines10030397), 2022-03-04

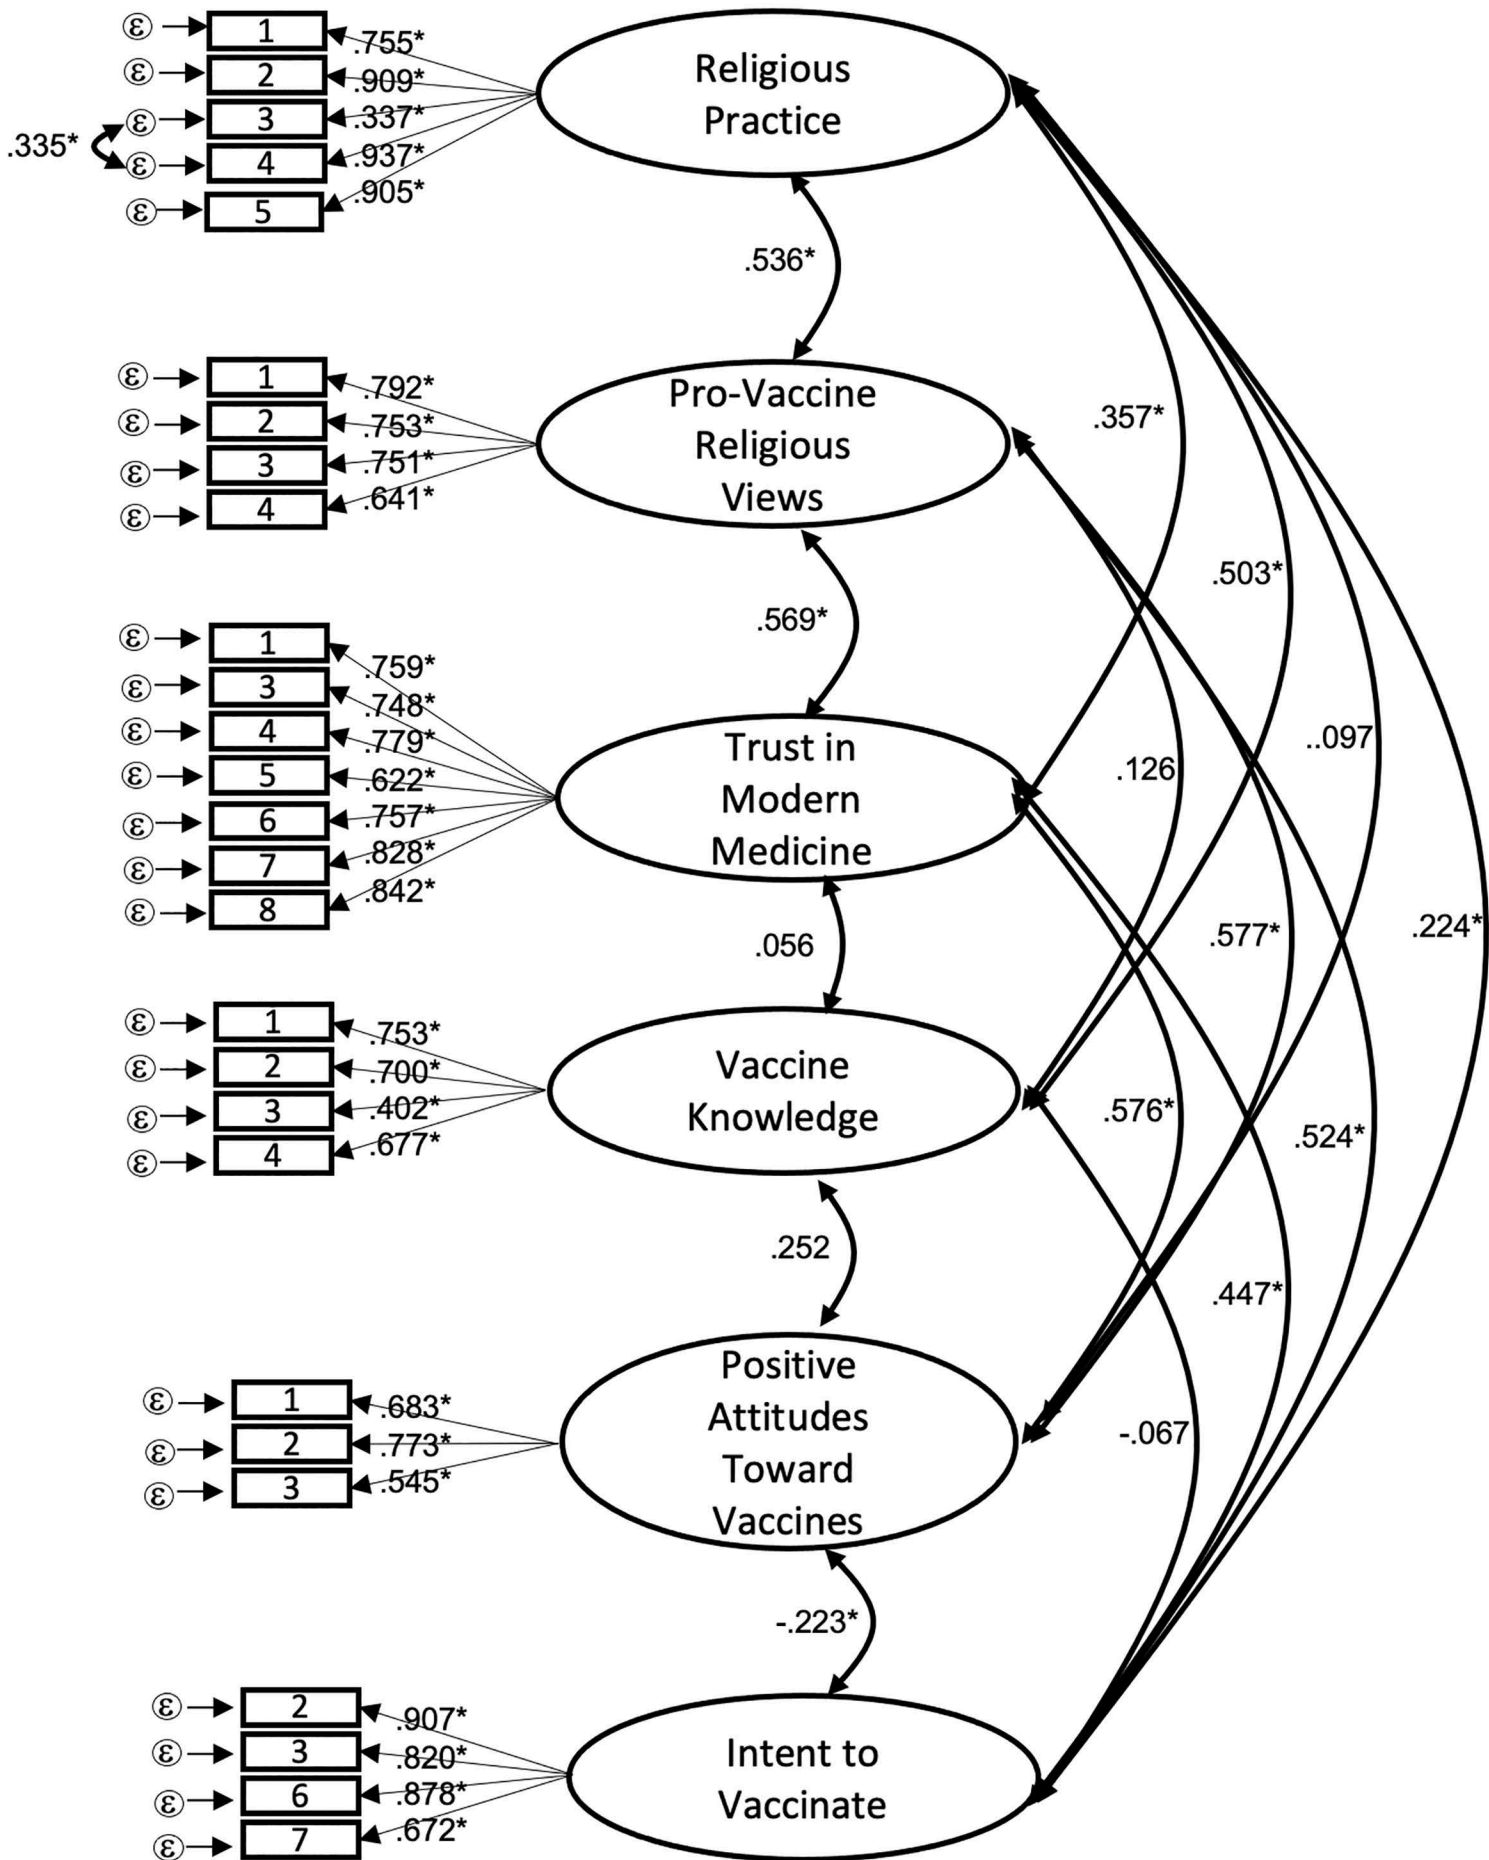

Supplement: s1 [file s1]

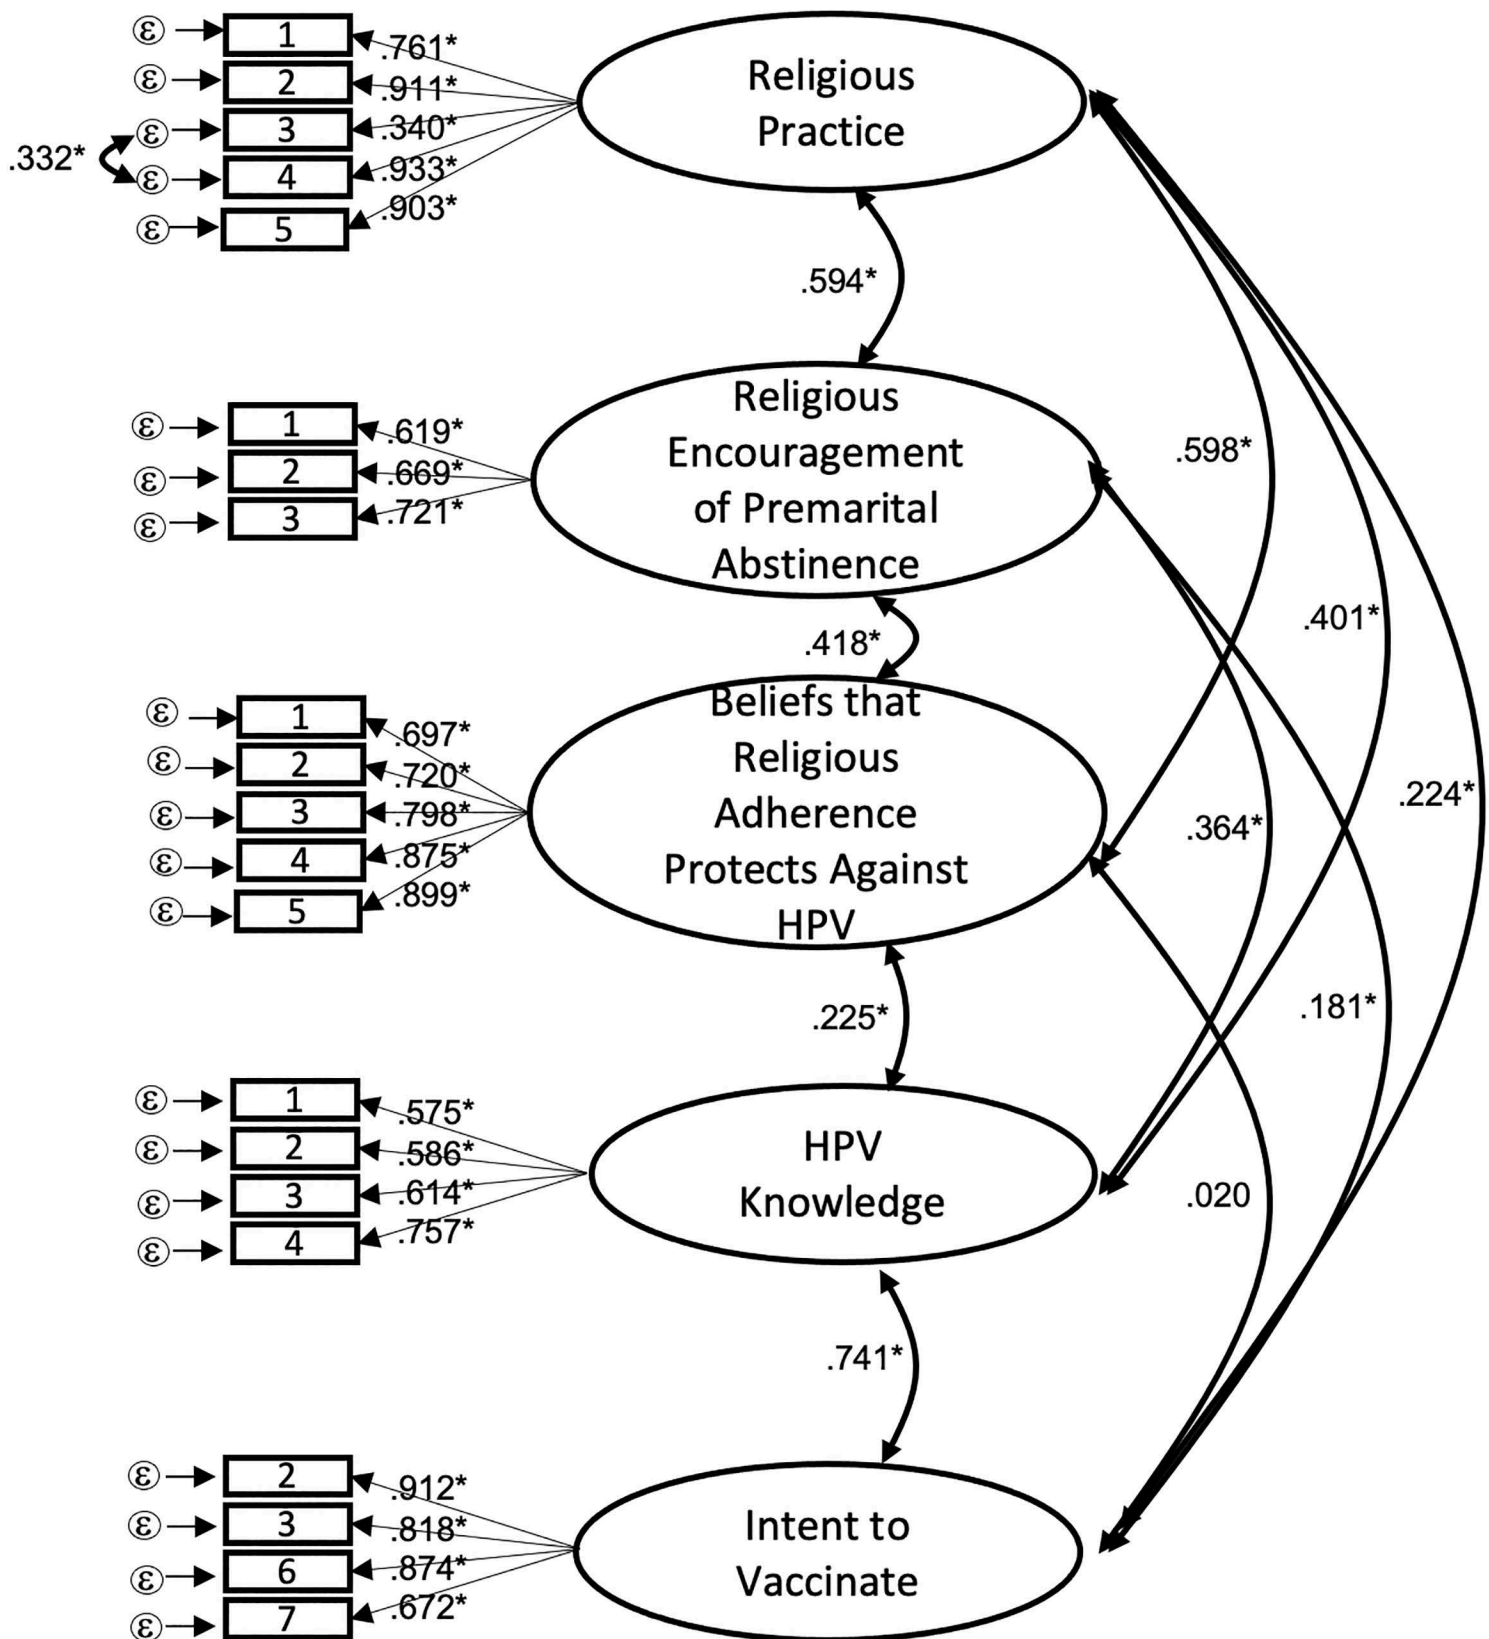

Supplement: s1 [file s1]
